# Supplementary material for: Effectiveness and Safety of Acupuncture for Migraine: An Overview of Systematic Reviews
Source: Hindawi journal article supplement (doi:10.1155/2020/3825617), 2020-03-23
Supplement: f1 [file 3825617.f1.pdf]

## S1\_Appendix Search strategies

### MEDLINE via OVID search strategy

- 1 Headache/28178
- 2 exp Headache Disorders/35523
- 3 (headach\* or migrain\* or cephalgi\* or cephalalgi\*).mp.112211
- 4 1 or 2 or 3112275
- 5 exp acupuncture/1591
- 6 exp acupuncture therapy/22015
- 7 exp acupuncture points/5617
- 8 exp acupuncture ear/366
- 9 exp auriculotherapy/407
- 10 exp electroacupuncture/3425
- 11 exp electric stimulation therapy/78018
- 12 exp acupressure/649
- 13 exp moxibustion/1584
- 14 (acupuncture\$ or electroacupuncture\$).tw.22047
- 15 (acupuncture\$ or moxibustion).tw.20581
- 16 5 or 6 or 7 or 8 or 9 or 10 or 11 or 12 or 13 or 14 or 15.101831
- 17 meta analysis/97965
- 18 (systematic\$ adj review\$).tw.129211
- 19 meta analy\$.tw.136494
- 20 17 or 18 or 19.233209
- 21 4 and 16 and 20.123

### EMBASE search strategy

- 1 exp "headache and facial pain"/266355
- 2 (headach\* or migrain\* or cephalgi\* or cephalalgi\*).mp.271370

- 3 1 or 2.289473
- 4 exp acupuncture/41431
- 5 exp electroacupuncture/5583
- 6 exp acupressure/1793
- 7 exp moxibustion/2365
- 8 (acupuncture\$ or electroacupuncture\$).tw.29842
- 9 (acupuncture\$ or moxibustion).tw.28182
- 10 4 or 5 or 6 or 7 or 8 or 9.43863
- 11 review.pt.2353253
- 12 meta analysis/139536
- 13 (systematic\$ adj review\$).tw.146726
- 14 meta analy\$.tw.159430
- 15 11 or 12 or 13 or 14.2531951
- 16 3 and 10 and 15

## S2\_Appendix 2 Excluded systematic reviews

| References                                                                                                                                                                                                                                         | Reason for exclusion              |
|----------------------------------------------------------------------------------------------------------------------------------------------------------------------------------------------------------------------------------------------------|-----------------------------------|
| Coeytaux R R, Befus D. Role of Acupuncture in the Treatment or Prevention of Migraine, Tension-Type Headache, or Chronic Headache Disorders.[J]. Headache, 2016, 56(7):1238-1240.                                                                  | Not systematic review             |
| Kasle D, Kligler B. Systematic review of acupuncture versus medication for migraine prophylaxis.[J]. Journal of Alternative & Complementary Medicine, 2014, 20(5):42-3.                                                                            | Commentary                        |
| Posadzki P, Albedah A M, Khalil M M, et al. Complementary and alternative medicine for the prevention and treatment of migraine headache: an overview of systematic reviews[J]. Focus on Alternative & Complementary Therapies, 2015, 20(2):58-73. | Not systematic review             |
| Zhang N, Hindiyeh N, Houle T, et al. Systematic Review of Acupuncture vs. Standard Pharmacological Therapy for the Prevention of Migraine[C]//HEADACHE. 111 RIVER ST, HOBOKEN 07030-5774, NJ USA: WILEY-BLACKWELL, 2016, 56: 69-69.                | Narrative systematic review       |
| Cheong Y C, Dix S, Hung Y N E, et al. Acupuncture and assisted reproductive technology[J]. Cochrane Database Syst Rev, 2013, 7(7):CD006920.                                                                                                        | Not systematic review             |
| Linde K, Allais G, Brinkhaus B, et al. Acupuncture for the prevention of episodic migraine[J]. The Cochrane Library, 2016.                                                                                                                         | Updated Cochranere view available |
| Coeytaux R R, Befus D. Role of Acupuncture in the Treatment or Prevention of Migraine, Tension-Type Headache, or Chronic Headache Disorders.[J]. Headache, 2016, 56(7):1238-1240.                                                                  | Not systematic review             |

- France S, Bown J, Nowosilskyj M, et al. Evidence for the use of dry needling and physiotherapy in the management of cervicogenic or tension-type headache: a systematic review[J]. *Cephalalgia An International Journal of Headache*, 2014, 34(12):994-1003. Compared different forms of acupuncture
- Linde K, Allais G, Brinkhaus B, et al. Acupuncture for tension-type headache[J]. *Cochrane database of systematic reviews (Online)*, 2009 (1): CD007587. Updated Cochranere view available
- Meissner K, Fässler M, Rucker G, et al. Differential effectiveness of placebo treatments: a systematic review of migraine prophylaxis.[J]. *Jama Internal Medicine*, 2013, 173(21):1941-1951. Acupuncture was not the main intervention
- Nielsen A. acupuncture for the Prevention of Tension-type Headache (2016)[J]. *Explore: The Journal of Science and Healing*, 2017, 13(3): 228-231. Not systematic review
- Posadzki P, Albedah A M, Khalil M M, et al. Complementary and alternative medicine for the prevention and treatment of migraine headache: an overview of systematic reviews[J]. *Focus on Alternative & Complementary Therapies*, 2015, 20(2):58-73. Not systematic review
- Lei Zhao, Yi Guo, Wei Wang, et al. Systematic review on randomized controlled clinical trials of acupuncture therapy for neurovascular headache.[J]. *Chinese Journal of Integrative Medicine*, 2011, 17(8):580-586. Narrative systematic review
- Hui Z, Min C, Huang D, et al. Interventions for migraine prophylaxis: protocol of an umbrella systematic review and network meta-analysis[J]. *Bmj Open*, 2015, 5(5):e007594. Not systematic review
- Melchart D, Linde K, Fischer P, et al. Acupuncture for idiopathic headache[J]. *Cochrane Database Syst Rev*, 2001, 1(1):CD001218. Updated Cochranere view available
- Baumler P I, Fleckenstein J, Takayama S, et al. Effects of Acupuncture on Sensory Perception: A Systematic Review and Meta-Analysis[J]. *Plos One*, 2015, 58(2):29-30. Migraine was not the main research object
- Chiang C C, Schwedt T J, Wang S J, et al. Treatment of medication-overuse headache: A systematic review.[J]. *Cephalalgia*, 2015, 36(4). Acupuncture was not the main intervention

|                                                                                                                                                                                                                                                     |                                           |
|-----------------------------------------------------------------------------------------------------------------------------------------------------------------------------------------------------------------------------------------------------|-------------------------------------------|
| de Groot F M, Voogt-Bode A, Passchier J, et al. Headache: the placebo effects in the control groups in randomized clinical trials; an analysis of systematic reviews[J]. Journal of Manipulative & Physiological Therapeutics, 2011, 34(5):297-305. | Acupuncture was not the main intervention |
| Dincer F, Linde K. Sham interventions in randomized clinical trials of acupuncture--a review.[J]. Complementary Therapies in Medicine, 2003, 11(4):235-242.                                                                                         | Migraine was not the main research object |
| Ernst E. Serious adverse effects after acupuncture - A systematic review (2000-2009)[J]. Perfusion, 2010, 23(6):214-225.                                                                                                                            | Migraine was not the main research object |
| Vickers A J, Linde K. Acupuncture for chronic pain[J]. Jama, 2014, 311(9): 955-956.                                                                                                                                                                 | Not systematic review                     |
| Spoerel W E. Acupuncture in chronic pain[J]. The American journal of Chinese medicine, 1976, 4(03): 267-279.                                                                                                                                        | Not systematic review                     |
| Fishbain D A. Non-surgical chronic pain treatment outcome: a review[J]. International Review of Psychiatry, 2009, 12(2):170-180.                                                                                                                    | Not systematic review                     |
| Gladstone J P, Dodick D W. Current and emerging treatment options for migraine and other primary headache disorders[J]. Expert Review of Neurotherapeutics, 2003, 3(6):845.                                                                         | Not systematic review                     |
| Peikert A, Wilimzig C, Köhne-Volland R. Prophylaxis of migraine with oral magnesium: results from a prospective, multi-center, placebo-controlled and double-blind randomized study[J]. Cephalalgia, 1996, 16(4): 257-263.                          | Not systematic review                     |
| Facchinetti F, Sances G, Borella P, et al. Magnesium prophylaxis of menstrual migraine: effects on intracellular magnesium[J]. Headache: The Journal of Head and Face Pain, 1991, 31(5): 298-301.                                                   | Acupuncture was not the main intervention |
| Hämäläinen M L. Migraine in children and adolescents: a guide to drug treatment[J]. Cns Drugs, 2006, 20(20):813-820.                                                                                                                                | Not systematic review                     |
| Hao X A, Xue C C, Dong L, et al. Factors associated with conflicting findings on acupuncture for tension-type headache: qualitative and quantitative analyses.[J]. J Altern Complement Med, 2013, 19(4):285-297.                                    | Acupuncture was not the main intervention |

Jena M, Mishra S, Pradhan S, et al. Chronic pain, its management and psychological issues: A review[J]. Asian Acupuncture was not the main intervention  
Journal of Pharmaceutical & Clinical Research, 2015, 8(5):42-47.

Jindal V, Ge A, Mansky P J. Safety and efficacy of acupuncture in children: a review of the evidence.[J]. J Pediatr Migraine was not the main research object  
Hematol Oncol, 2008, 30(6):431-442.

Kreitschmann-Andermahr I, Siegel S, Carneiro R W, et al. Headache and pituitary disease: a systematic review[J]. Migraine was not the main research object  
Clinical Endocrinology, 2013, 79(6):760-769.

Malone M D, Strube M J. Meta-analysis of non-medical treatments for chronic pain[J]. Pain, 1988, 34(3): 231- Acupuncture was not the main intervention  
244.

Lenssinck M L, Damen L, Verhagen A P, et al. The effectiveness of physiotherapy and manipulation in patients Acupuncture was not the main intervention  
with tension-type headache: a systematic review.[J]. Pain, 2004, 112(3):381-388.

Melchart D, Linde K, Fischer P, et al. Acupuncture for recurrent headaches: a systematic review of randomized No separate data of acupuncture for  
controlled trials.[J]. Cephalalgia, 2010, 19(9):779-786. migraine

Liu H, Li H, Xu M, et al. A systematic review on acupuncture for trigeminal neuralgia[J]. Alternative Therapies No separate data of acupuncture for  
in Health & Medicine, 2010, 16(6):30. migraine

Luedtke K, May A. EHMTI-0091. Physiotherapy interventions for headaches: a systematic review and meta- Acupuncture was not the main intervention  
analysis[J]. Journal of Headache & Pain, 2014, 15(Suppl 1):D38-D38.

Becker W J. Headache in Primary Care[J]. Cephalalgia, 2010, 21(2):162-162. Not systematic review

Molsberger A. Commentary on the Cochrane review of acupuncture for tension-type headache.[J]. Explore, 2009, Commentary  
5(6):356-358.

Muñoz-Ortego J, Solans-Domènech M, Carrion C. [Medical indications for acupuncture: Systematic review][J]. Migraine was not the main research object  
Med Clin, 2016, 147(6):250.

Maurizio P, Gianluca S, Marco I, et al. Patient outcome in migraine prophylaxis: the role of Acupuncture was not the main intervention psychopharmacological agents[J]. Patient Related Outcome Measures, 2010, 1(5):107-118.

Rea P A, Kamani T, Narasimhan M. A review of the management of migraine associated vertigo[J]. Not systematic review Otorhinolaryngologist, 2012, 5(2):80-85.

Sherman K J, Coeytaux R R. Acupuncture for the treatment of common pain conditions: Chronic back pain, No separate data of acupuncture for osteoarthritis, and headache[J]. Journal of Clinical Outcomes Management Jcom, 2009, 16(5):224-230. migraine

Vickers A, Cronin A, Maschino A, et al. OA03.01. Acupuncture for chronic pain: an individual patient data meta- Migraine was not the main research object analysis of randomized trials.[J]. BMC Complementary & Alternative Medicine, 2012, 12(1):1-1.

Wang D, Yang W, Liu M. Acupuncture for neurological disorders in the Cochrane reviews Characteristics of Migraine was not the main research object included reviews and studies[J]. Neural Regeneration Research, 2011, 06(6):440-443.

Scott S W, Deare J C, Ferrigno P, et al. Acupuncture for Migraine: A Systematic Review[J]. Australian Journal of Insufficient data Acupuncture & Chinese Medicine, 2006, 1(1).

D.P. O'Mathúna. Systematic reviews reveal benefits of acupuncture for prevention of migraines and tension-type Not systematic review headaches[J]. Alternative Medicine Alert, 2009, 12(8):94-96.

Du R, Wang Y, Liu X, et al. Acupuncture for acute migraine attacks in adults: a systematic review protocol[J]. Not systematic review Bmj Open, 2015, 5(4):e006968.

Coeytaux R R, Befus D. Role of Acupuncture in the Treatment or Prevention of Migraine, Tension-Type Not systematic review Headache, or Chronic Headache Disorders.[J]. Headache, 2016, 56(7):1238-1240.

Davis M A, Kononowech R W, Rolin S A, et al. Acupuncture for Tension-Type Headache: A Meta-Analysis of Not systematic review Randomized, Controlled Trials[J]. Journal of Pain, 2008, 9(8):667-677.

Lisa A, Maione L, Vinci V, et al. A Systematic Review of Peripheral Nerve Interventional Treatments for Chronic No separate data of acupuncture for Headaches.[J]. Annals of Plastic Surgery, 2014, 72(4):439. migraine

---
